# Supplementary material for: Light-driven fluorescence enhancement and self-assembled structural evolution of an azobenzene derivative
Source: Royal Society of Chemistry journal article supplement (doi:10.1039/c4tc01301h), 2014-01-01
Supplement: c4tc01301h1.pdf [file c4tc01301h1.pdf]

## Supporting Information

### Light-driven Fluorescence Enhancement and Self-assembled Structural Evolution of an Azobenzene Derivative

Xia Ran<sup>a</sup>, Haitao Wang<sup>b</sup>, Lili Shi<sup>a</sup>, Jie Lou<sup>a</sup>, Bo Liu<sup>a</sup>, Min Li<sup>b</sup>, and Lijun Guo<sup>\*a</sup>

<sup>a</sup>Institute of Photobiophysics, School of Physics and Electronics, Henan University, Kaifeng 475004, People's Republic of China

<sup>b</sup>Key Laboratory for Automobile Materials, Ministry of Education, Institute of Materials Science and Engineering, Jilin University, Changchun 130012, People's Republic of China

#### Synthesis

Scheme S1. Synthetic route for AOB-t8

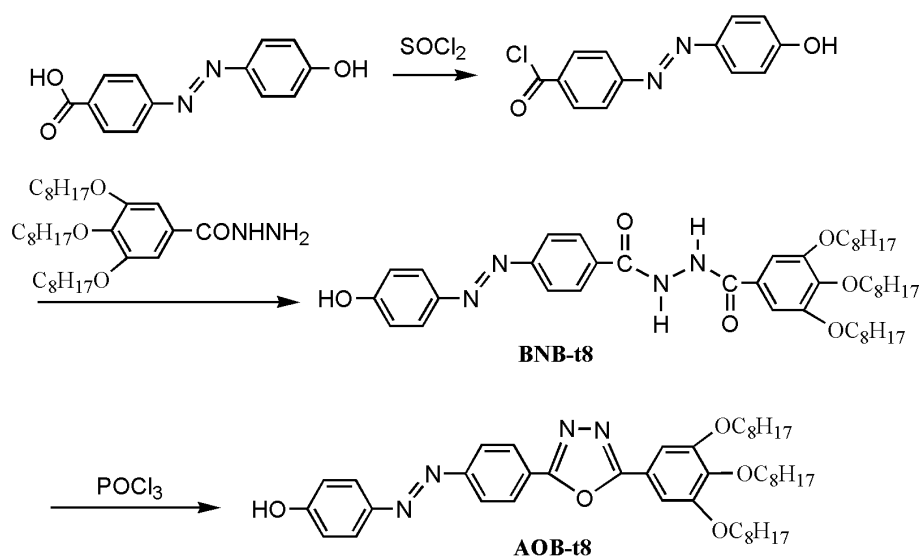

The compound,  $\text{N}-(3,4,5\text{-octanoxypheyl})\text{-N}^2\text{-4-}[(4\text{-hydroxyphenyl})\text{azophenyl}]$  1,3,4-oxadiazole (AOB-t8), was synthesized following the mechanism shown in Scheme S1. The hydrazine derivatives BNB-t8 were prepared by the route reported in our previous work [12]. The purified BNB-t8 was dissolved in phosphorous oxychloride ( $\text{POCl}_3$ ) and refluxed for about 40 h. The excess  $\text{POCl}_3$  was removed through distillation and the residue was slowly added to ice-water. After removal of the solvent

\*Corresponding author: juneguo@henu.edu.cn (L. G.).

under a reduced pressure, the final product AOB-t8 was purified by recrystallization from ethanol for further NMR, FT-IR spectroscopy and elemental analysis.

**N-(3,4,5-octanoxyphenyl)-N'-4-[(4-hydroxyphenyl)azophenyl] 1,3,4-oxadiazole (AOB-t8)**

$^1\text{H}$  NMR (400MHz,  $\text{DMSO-}d_6$ ), (ppm, from TMS): 8.35 (d, 2H,  $J=8.4$ ), 8.06 (d, 2H,  $J=8.8$ ), 7.97 (d, 2H,  $J=8.8$ ), 7.40 (d, 2H,  $J=9.2$ ), 7.36 (s, 2H), 4.05-3.93 (m, 6H), 1.88-1.64 (m, 6H), 1.47-1.23 (m, 30H), 0.87-0.84 (m, 9H).

FT-IR (KBr, pellet,  $\text{cm}^{-1}$ ): 3426, 2956, 2925, 2855, 1592, 1551, 1494, 1468, 1440, 1386, 1326, 1292, 1227, 1119, 1029, 1009, 980, 855, 839, 746, 727.

Elemental analysis: calculated for  $\text{C}_{44}\text{H}_{62}\text{N}_4\text{O}_5$  (%): C, 72.69; H, 8.60; N, 7.71. Found: C, 72.57; H, 8.85; N, 7.63.

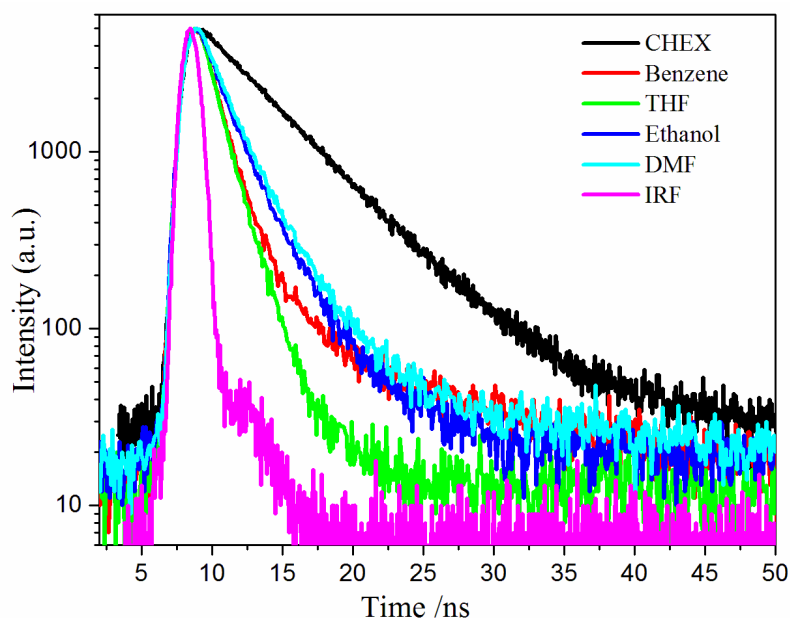

Fig. S1 Fluorescence lifetime decay profiles (excitation at 295 nm) of AOB-t8 in different solvents.

**Table S1.** Photophysical characteristics of AOB-t8 ( $1 \times 10^{-5}$  M and  $1 \times 10^{-3}$  M) in ethanol at room temperature.

| UV 365nm | $1 \times 10^{-5}$ mol/L    |                            |                                        | $1 \times 10^{-3}$ mol/L    |                            |                                        |
|----------|-----------------------------|----------------------------|----------------------------------------|-----------------------------|----------------------------|----------------------------------------|
|          | $\lambda_{\text{abs}}$ (nm) | $\lambda_{\text{em}}$ (nm) | $\Phi_{\text{F}}$ ( $\times 10^{-2}$ ) | $\lambda_{\text{abs}}$ (nm) | $\lambda_{\text{em}}$ (nm) | $\Phi_{\text{F}}$ ( $\times 10^{-2}$ ) |
| 0 min    | 365                         | 434                        | <b>0.24</b>                            | 357                         | 436                        | <b>0.11</b>                            |
| 30 min   | -                           | -                          | 0.62                                   | 356                         | 435                        | 0.13                                   |
| 50 min   | 297                         | 386, 417, 423              | 4.21                                   | 356                         | 435                        | 0.18                                   |
| 70 min   | 266                         | 370, 416                   | <b>5.83</b>                            | -                           | -                          | -                                      |
| 130min   | -                           | -                          | -                                      | 299, 354                    | 424                        | 0.26                                   |
| 240min   | -                           | -                          | -                                      | 290                         | 414                        | 28.31                                  |
| 290min   | -                           | -                          | -                                      | 270                         | 380, 414                   | <b>33.71</b>                           |

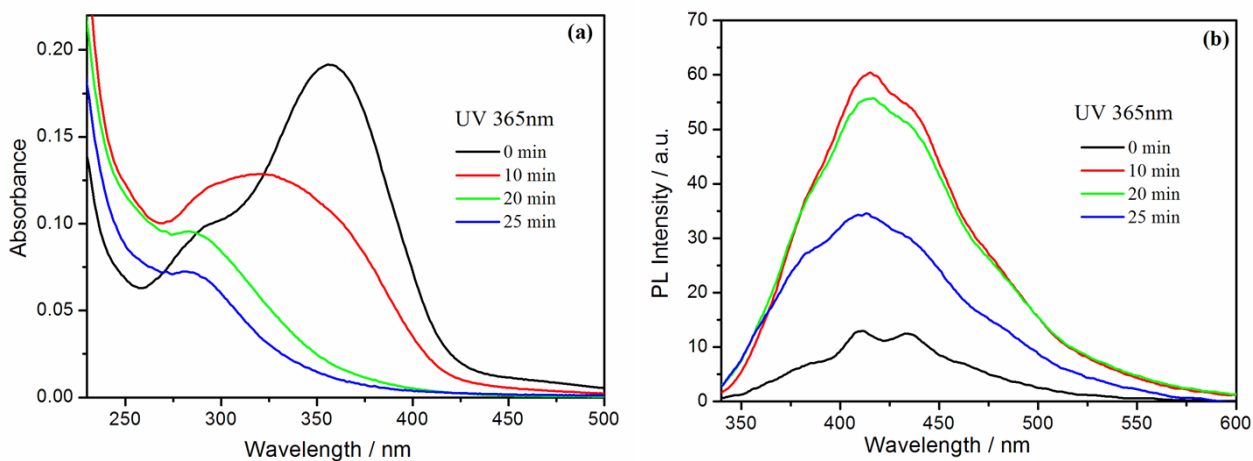

Fig. S2 (a) UV-vis and (b) fluorescence spectra of AOB-t8 in dichloromethane ( $1 \times 10^{-5}$  M) under 365 nm irradiation for different time at room temperature.

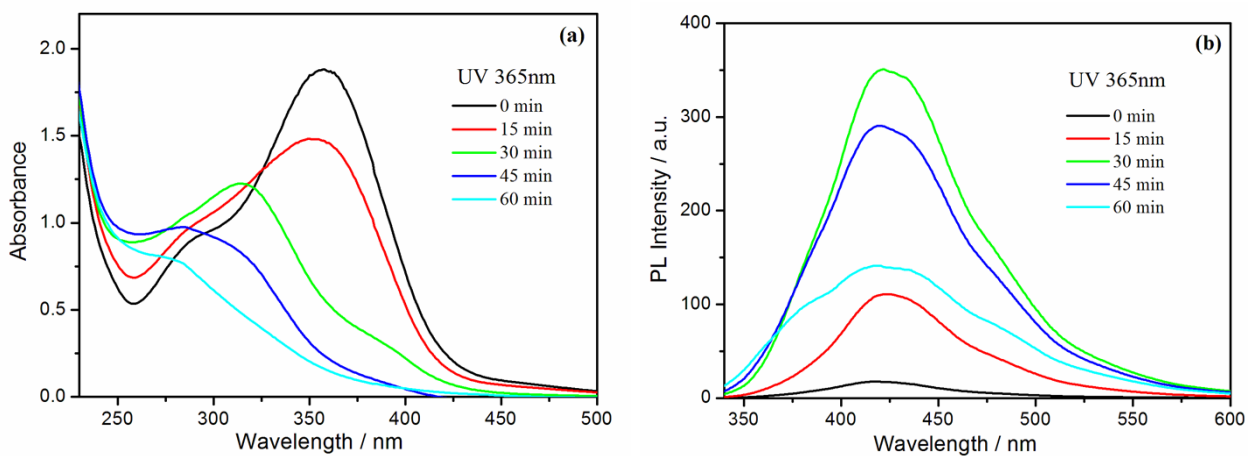

Fig. S3 (a) UV-vis and (b) fluorescence spectra of AOB-t8 in dichloromethane ( $1 \times 10^{-3}$  M) under 365 nm irradiation for different time at room temperature.

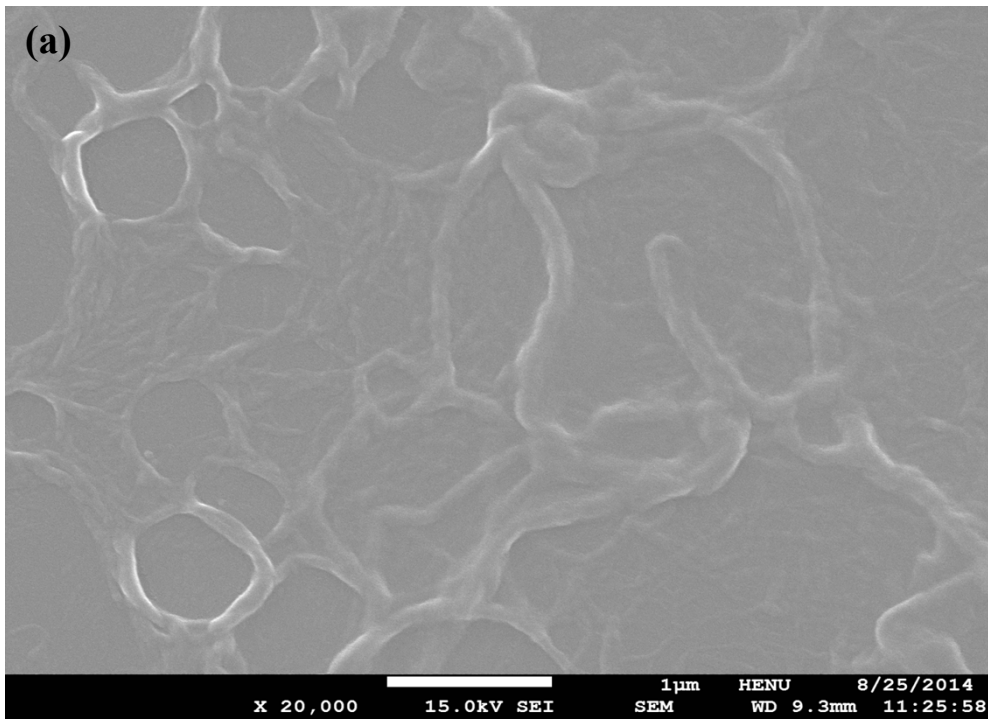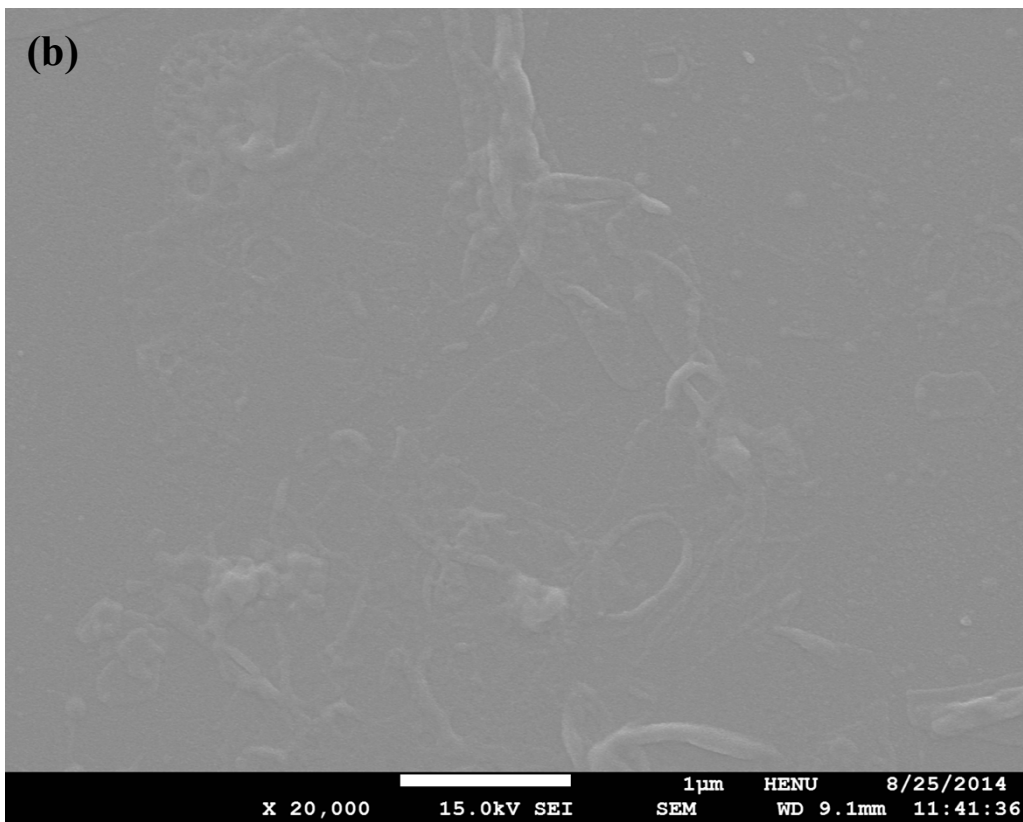

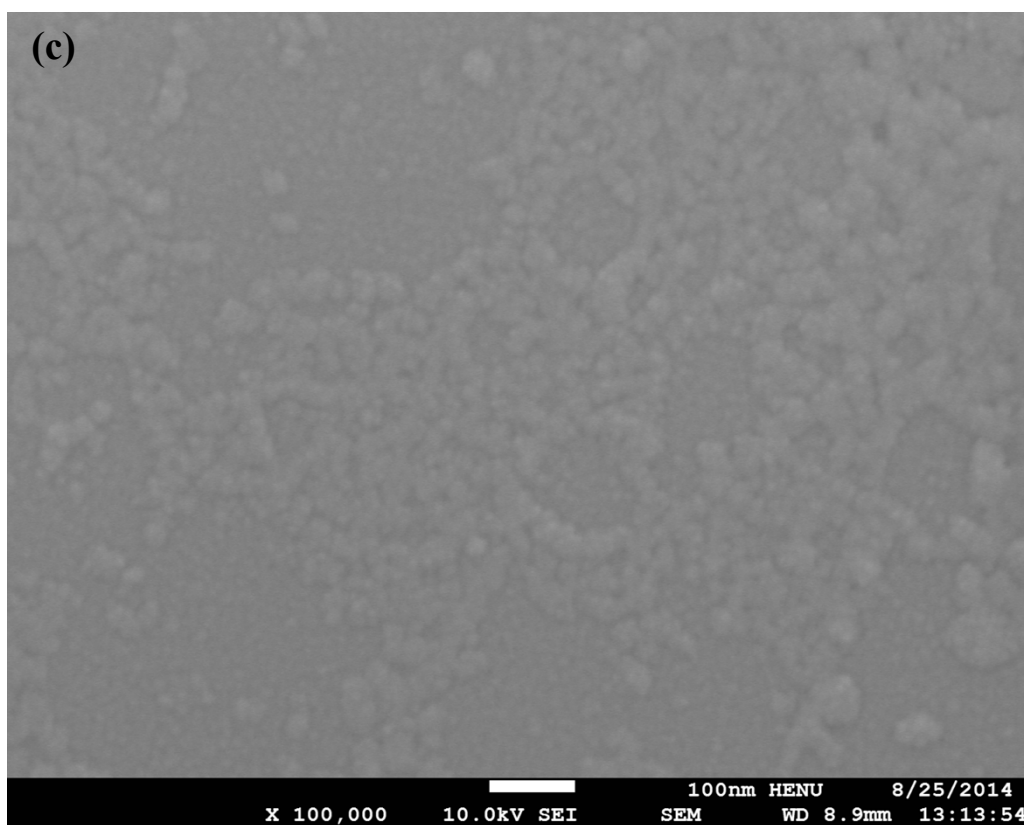

Fig. S4 SEM images of AOB-t8 in dichloromethane ( $1 \times 10^{-5}$  M) (a) before UV light, (b) after exposure to UV light for 15 min and (c) for 25 min.

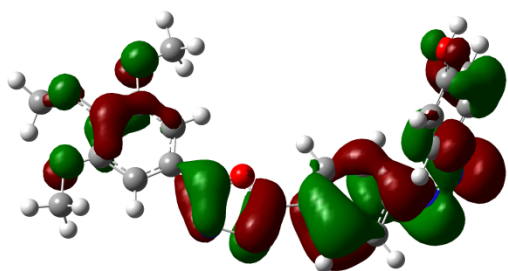

*cis*-109

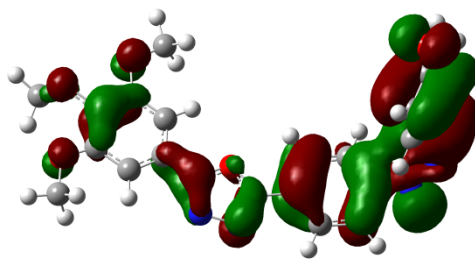

*cis* -110

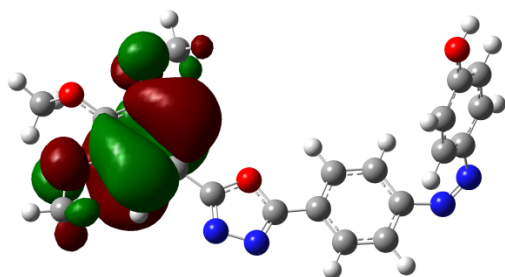

*cis* -111

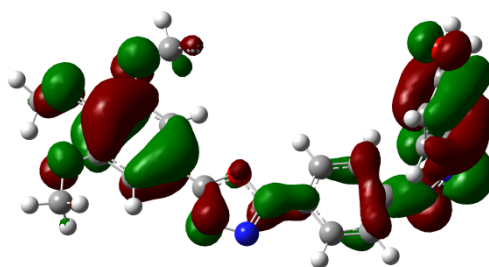

*cis* -112

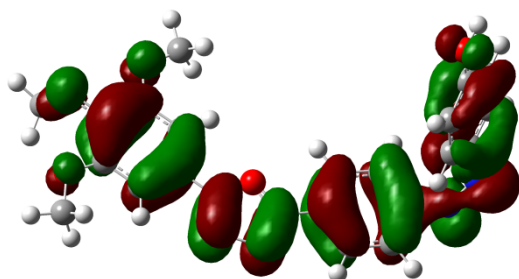

*cis* -113(HOMO)

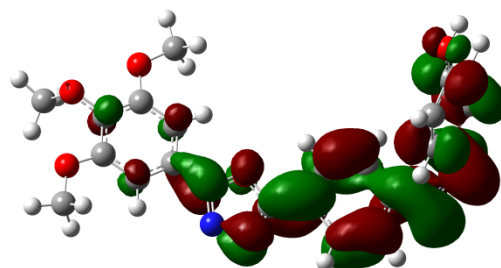

*cis* -114(LUMO)

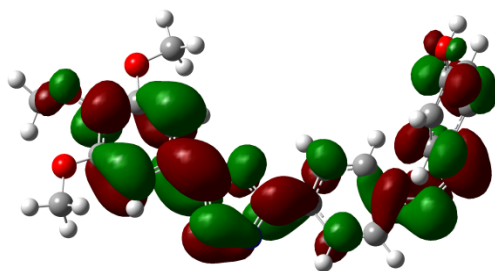

*cis* -115

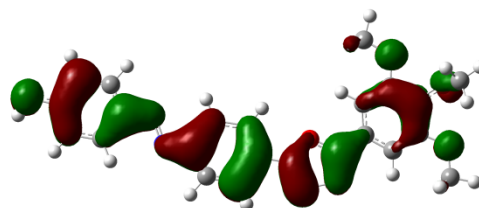

*trans* -109

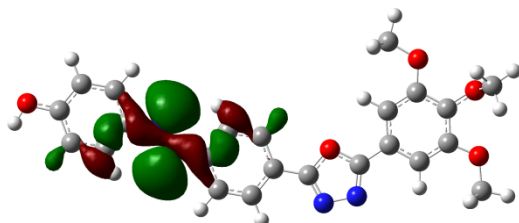

*trans* -110

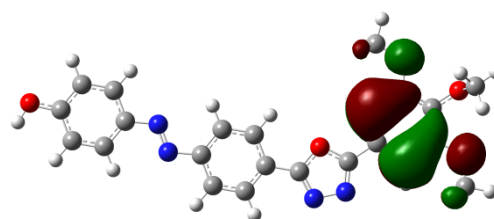

*trans* -111

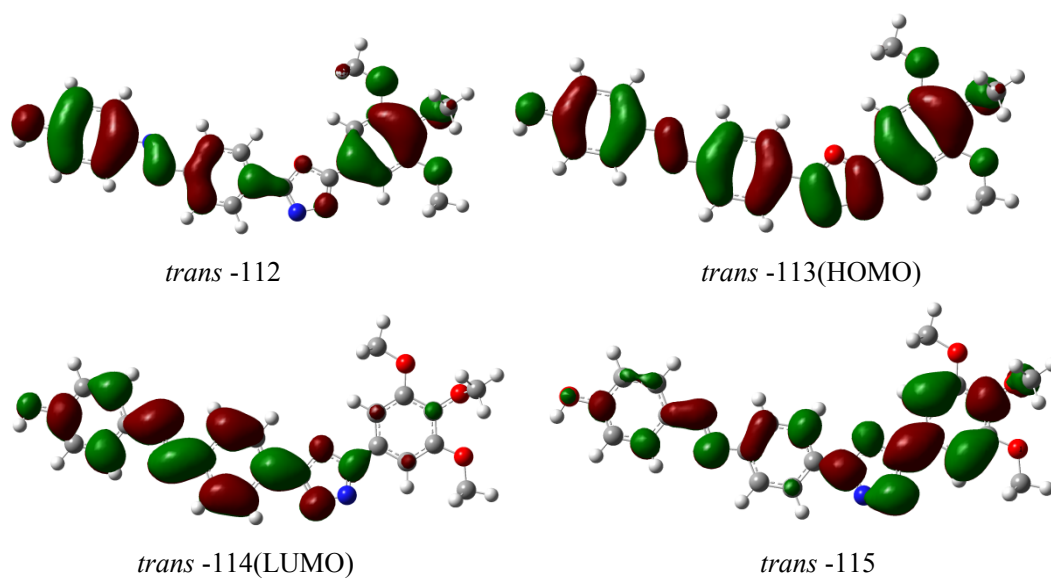

**Fig. S5** Electron density diagrams of molecular orbitals of *trans*-AOB-t1 and *cis*-AOB-t1 computed with CAM-B3LYP/6-31G\*\* method, respectively.
